# Supplementary material for: Comparative Metabolomic Analysis of Rapeseeds from Three Countries
Source: PubMed Central journal article supplement (PMC6724143; doi:10.3390/metabo9080161), 2019-08-01
Supplement: metabolites-09-00161-s001.pdf [file metabolites-09-00161-s001.pdf]

Article

# Comparative Metabolomic Analysis of Rapeseeds from Three Countries

Ruinan Yang <sup>1,2,†</sup>, Ligang Deng <sup>3,†</sup>, Liangxiao Zhang <sup>1,4,5,†</sup>, Xiaofeng Yue <sup>1,5</sup>, Jin Mao <sup>1,5</sup>, Fei Ma <sup>1,5</sup>, Xiupin Wang <sup>1,5</sup>, Qi Zhang <sup>1,2,6</sup>, Wen Zhang <sup>1,5</sup> and Peiwu Li <sup>1,4,5,6,\*</sup>

<sup>1</sup> Oil Crops Research Institute, Chinese Academy of Agricultural Sciences, Wuhan 430062, China

<sup>2</sup> Key Laboratory of Biology and Genetic Improvement of Oil Crops, Ministry of Agriculture and Rural Affairs, Wuhan 430062, China

<sup>3</sup> Institute of Agricultural Quality Standards and Testing Technology Research, Shandong Academy of Agricultural Sciences, Jinan 250100, China

<sup>4</sup> Laboratory of Quality and Safety Risk Assessment for Oilseed Products (Wuhan), Ministry of Agriculture and Rural Affairs, Wuhan 430062, China

<sup>5</sup> Quality Inspection and Test Center for Oilseed Products, Ministry of Agriculture and Rural Affairs, Wuhan 430062, China

<sup>6</sup> Key Laboratory of Detection for Mycotoxins, Ministry of Agriculture and Rural Affairs, Wuhan 430062, China

\* Correspondence: peiwuli@oilcrops.cn

† These authors contributed equally to this work.

**Table S1.** Metabolites in rapeseed identified based on UPLC-Q-TOF/MS.

| No. | Chemical Compound                              | Formula       | Class                        | KEGG No. |
|-----|------------------------------------------------|---------------|------------------------------|----------|
| 1   | Homogentisate                                  | C8H8O4        | Organic acids                | C00544   |
| 2   | Octanoic acid                                  | C8H16O2       | Fatty acids                  | C06423   |
| 3   | Scopoletin                                     | C10H8O4       | Phenylpropanoids             | C01752   |
| 4   | Herniarin                                      | C10H8O3       | Phenylpropanoids             | C09268   |
| 5   | 1-Acetoxy-pinoreosinol                         | C22H24O8      | Phenylpropanoids             | C10544   |
| 6   | Coniferyl aldehyde                             | C10H10O3      | Phenylpropanoids             | C02666   |
| 7   | Umbelliferone                                  | C9H6O3        | Phenylpropanoids             | C09315   |
| 8   | Dehydrocycloguanandin                          | C18H14O4      | Polyketides                  | C10055   |
| 9   | Rutin                                          | C27H30O16     | Flavonoids                   | C05625   |
| 10  | Tulipanin                                      | C27H31O16     | Flavonoids                   | C16315   |
| 11  | Luteolin 7-O-beta-D-glucoside                  | C21H20O11     | Flavonoids                   | C03951   |
| 12  | N-(L-Arginino)succinate                        | C10H18N4O6    | Amino acids                  | C03406   |
| 13  | Chlorogenate                                   | C16H18O9      | Phenylpropanoids             | C00852   |
| 14  | cis-2-Hydroxycinnamate                         | C9H8O3        | Phenylpropanoids             | C05838   |
| 15  | Naringenin 7-O-beta-D-glucoside                | C21H22O10     | Flavonoids                   | C09099   |
| 16  | L-2-Amino adipate                              | C6H11NO4      | Amino acids                  | C00956   |
| 17  | Nicotinate                                     | C6H5NO2       | Alkaloids                    | C00253   |
| 18  | L-Glutamate                                    | C5H9NO4       | Amino acids                  | C00025   |
| 19  | Glutathione disulfide                          | C20H32N6O12S2 | Amino acid related compounds | C00127   |
| 20  | L-Tyrosine                                     | C9H11NO3      | Amino acids                  | C00082   |
| 21  | Leucocyanidin                                  | C15H14O7      | Flavonoids                   | C05906   |
| 22  | L-Cysteine                                     | C3H7NO2S      | Amino acids                  | C00097   |
| 23  | Coniferin                                      | C16H22O8      | Phenylpropanoids             | C00761   |
| 24  | 7-Aminomethyl-7-carbaguanine                   | C7H9N5O       | Others                       | C16675   |
| 25  | N-Formylmethionine                             | C6H11NO3S     | Amino acids                  | C03145   |
| 26  | 5-Amino-4-oxopentanoate                        | C5H9NO3       | Organic acids                | C00430   |
| 27  | 2,4-Diacetamido-2,4,6-trideoxy-D-mannopyranose | C10H18N2O5    | Others                       | C20424   |
| 28  | Xanthurenic acid                               | C10H7NO4      | Amino acid related compounds | C02470   |
| 29  | N-Methylnicotinate                             | C7H7NO2       | Alkaloids                    | C01004   |
| 30  | 4-Coumarate                                    | C9H8O3        | Phenylpropanoids             | C00811   |
| 31  | Desulfoglucotropeolin                          | C14H19NO6S    | Others                       | C01069   |
| 32  | Quercetin 3-sophorotrioside                    | C33H40O22     | Flavonoids                   | C12668   |
| 33  | Ferulate                                       | C10H10O4      | Phenylpropanoids             | C01494   |
| 34  | Cyanidin 3,5,3'-tri-O-glucoside                | C33H41O21     | Flavonoids                   | C08629   |
| 35  | Kaempferol 3-sophorotrioside                   | C33H40O21     | Flavonoids                   | C12635   |
| 36  | Lucenin-2                                      | C27H30O16     | Flavonoids                   | C10102   |
| 37  | Quercitrin                                     | C21H20O11     | Flavonoids                   | C01750   |

|    |                                                        |            |                              |        |
|----|--------------------------------------------------------|------------|------------------------------|--------|
| 38 | Cyanin                                                 | C27H31O16  | Flavonoids                   | C08639 |
| 39 | cis-3,4-Leucopelargonidin                              | C15H14O6   | Flavonoids                   | C03648 |
| 40 | Malonylawobanin                                        | C39H39O22  | Flavonoids                   | C08653 |
| 41 | Anthranelate                                           | C7H7NO2    | Organic acids                | C00108 |
| 42 | Quercetin 3-O-beta-D-glucosyl-(1->2)-beta-D-glucoside  | C27H30O17  | Flavonoids                   | C12667 |
| 43 | Quercetin 3-O-glucoside                                | C21H20O12  | Flavonoids                   | C05623 |
| 44 | Caffeyl alcohol                                        | C9H10O3    | Phenylpropanoids             | C12206 |
| 45 | Cyanidin                                               | C15H11O6   | Flavonoids                   | C05905 |
| 46 | Kaempferol                                             | C15H10O6   | Flavonoids                   | C05903 |
| 47 | trans-2-Hydroxycinnamate                               | C9H8O3     | Phenylpropanoids             | C01772 |
| 48 | Bergaptol                                              | C11H6O4    | Phenylpropanoids             | C00758 |
| 49 | Lathodoratin                                           | C11H10O4   | Polyketides                  | C09012 |
| 50 | 5-Hydroxyconiferyl alcohol                             | C10H12O4   | Phenylpropanoids             | C12205 |
| 51 | Sinapine                                               | C16H24NO5  | Phenylpropanoids             | C00933 |
| 52 | Khellol glucoside                                      | C19H20O10  | Polyketides                  | C09011 |
| 53 | Coniferyl alcohol                                      | C10H12O3   | Phenylpropanoids             | C00590 |
| 54 | (-)-Jasmonic acid                                      | C12H18O3   | Fatty acids                  | C08491 |
| 55 | Sinensetin                                             | C20H20O7   | Flavonoids                   | C10186 |
| 56 | N-Acetylaspartylglutamate                              | C11H16N2O8 | Amino acid related compounds | C12270 |
| 57 | 4',5,6,7-Tetramethoxyflavone                           | C19H18O6   | Flavonoids                   | C14472 |
| 58 | 4-Hydroxyphenylacetate                                 | C8H8O3     | Phenylpropanoids             | C00642 |
| 59 | 5-(2-Hydroxyethyl)-4-methylthiazole                    | C6H9NOS    | Alkaloids                    | C04294 |
| 60 | Odoritol                                               | C17H18O5   | Flavonoids                   | C09807 |
| 61 | 3-O-Methylquercetin                                    | C16H12O7   | Flavonoids                   | C04443 |
| 62 | Malvidin-3-(p-coumaroyl)-rutinoside-5-glucoside        | C44H51O23  | Flavonoids                   | C16296 |
| 63 | Cyanidin 3-O-sophoroside                               | C27H31O16  | Flavonoids                   | C16306 |
| 64 | Kaempferol 3-O-beta-D-glucosyl-(1->2)-beta-D-glucoside | C27H30O16  | Flavonoids                   | C12634 |
| 65 | 1-O-Sinapoyl-beta-D-glucose                            | C17H22O10  | Phenylpropanoids             | C01175 |
| 66 | Luteolin                                               | C15H10O6   | Flavonoids                   | C01514 |
| 67 | Isoswertisin 2''-rhamnoside                            | C28H32O14  | Flavonoids                   | C12629 |
| 68 | 4-Coumaroylshikimate                                   | C16H16O7   | Phenylpropanoids             | C02947 |
| 69 | Quinate                                                | C7H12O6    | Organic acids                | C00296 |
| 70 | 3-(4-Hydroxyphenyl)lactate                             | C9H10O4    | Others                       | C03672 |
| 71 | Sinapate                                               | C11H12O5   | Phenylpropanoids             | C00482 |
| 72 | 1'-Acetoxychavicol acetate                             | C13H14O4   | Phenylpropanoids             | C10426 |
| 73 | Tangeretin                                             | C20H20O7   | Flavonoids                   | C10190 |
| 74 | Samaderin A                                            | C18H18O6   | Terpenoids                   | C08781 |
| 75 | Abcisic acid glucose ester                             | C21H30O9   | Others                       | C15970 |
| 76 | 7,8-Dihydroxycoumarin                                  | C9H6O4     | Phenylpropanoids             | C03093 |
| 77 | Goyazensolide                                          | C19H20O7   | Terpenoids                   | C09467 |
| 78 | Eucommin A                                             | C27H34O12  | Phenylpropanoids             | C10560 |

|     |                                                              |            |                              |        |
|-----|--------------------------------------------------------------|------------|------------------------------|--------|
| 79  | Catechin 7-O-beta-D-xyloside                                 | C20H22O10  | Flavonoids                   | C09617 |
| 80  | Isorhamnetin                                                 | C16H12O7   | Flavonoids                   | C10084 |
| 81  | Iridin                                                       | C24H26O13  | Flavonoids                   | C10465 |
| 82  | Alectrol                                                     | C21H24O7   | Terpenoids                   | C09059 |
| 83  | 2-Methoxyestrone 3-sulfate                                   | C19H24O6S  | Terpenoids                   | C08358 |
| 84  | Cyanidin 3-O-(6"-glucosyl-2"-xylosylgalactoside)             | C32H39O20  | Flavonoids                   | C08612 |
| 85  | Fraxetin                                                     | C10H8O5    | Phenylpropanoids             | C09265 |
| 86  | 4,8-Dihydroxyquinoline                                       | C9H7NO2    | Amino acid related compounds | C05637 |
| 87  | Swietenidin B                                                | C11H11NO3  | Alkaloids                    | C10741 |
| 88  | Dalpanin                                                     | C26H30O12  | Flavonoids                   | C10416 |
| 89  | Abscisate                                                    | C15H20O4   | Terpenoids                   | C06082 |
| 90  | Aurantio-obtusin beta-D-glucoside                            | C23H24O12  | Polyketides                  | C10303 |
| 91  | Poncirin                                                     | C28H34O14  | Flavonoids                   | C09830 |
| 92  | Luteolin 7-O-[beta-D-glucuronosyl-(1->2)-beta-D-glucuronide] | C27H26O18  | Flavonoids                   | C12632 |
| 93  | Anthemis glycoside A                                         | C39H49NO21 | Amino acid related compounds | C08326 |
| 94  | 7-Methylxanthosine                                           | C11H15N4O6 | Alkaloids                    | C16352 |
| 95  | Vicianin                                                     | C19H25NO10 | Amino acid related compounds | C01870 |
| 96  | Ononin                                                       | C22H22O9   | Flavonoids                   | C10509 |
| 97  | 2-Oxo-10-methylthiodecanoic acid                             | C11H20O3S  | Fatty acids                  | C17232 |
| 98  | 3,7,4'-Tri-O-methylquercetin                                 | C18H16O7   | Flavonoids                   | C04444 |
| 99  | 5-(2'-Carboxyethyl)-4,6-dihydroypicolinate                   | C9H9NO6    | Amino acid related compounds | C05655 |
| 100 | Delphinidin 5-O-beta-D-glucoside 3-O-beta-D-sambubioside     | C32H39O21  | Others                       | C20494 |
| 101 | Coumarin                                                     | C9H6O2     | Phenylpropanoids             | C05851 |
| 102 | Scoparone                                                    | C11H10O4   | Phenylpropanoids             | C09311 |
| 103 | Fruticosonine                                                | C20H28N2O  | Alkaloids                    | C09191 |
| 104 | (S)-Norlaudanoline                                           | C16H17NO4  | Alkaloids                    | C02916 |
| 105 | 2-Oxo-7-methylthioheptanoic acid                             | C8H14O3S   | Fatty acids                  | C17220 |
| 106 | Pimelic acid                                                 | C7H12O4    | Fatty acids                  | C02656 |
| 107 | Hexadecaphinganine                                           | C16H35NO2  | Lipids                       | C13915 |
| 108 | (15Z)-12-Oxophyto-10,15-dienoic acid                         | C18H28O3   | Fatty acids                  | C01226 |
| 109 | Helminthosporol                                              | C15H24O2   | Terpenoids                   | C09678 |
| 110 | (9Z,11E)-(13S)-13-Hydroperoxyoctadeca-9,11-dienoic acid      | C18H32O4   | Fatty acids                  | C04717 |
| 111 | (9Z)-(13S)-12,13-Epoxyoctadeca-9,11-dienoic acid             | C18H30O3   | Fatty acids                  | C04594 |
| 112 | 2-Oxoctadecanoic acid                                        | C18H34O3   | Fatty acids                  | C00869 |
| 113 | Phytosphingosine                                             | C18H39NO3  | Lipids                       | C12144 |
| 114 | Stearidonic acid                                             | C18H28O2   | Fatty acids                  | C16300 |
| 115 | 5alpha-Ergosta-7,22-diene-3beta,5-diol                       | C28H46O2   | Terpenoids                   | C04416 |
| 116 | Cucurbitacin D                                               | C30H44O7   | Terpenoids                   | C08796 |
| 117 | 2-Methoxy-5Z-hexadecenoic acid                               | C17H32O3   | Fatty acids                  | C13792 |
| 118 | Allotetrahydrodeoxycorticosterone                            | C21H34O3   | Others                       | C13713 |
| 119 | Proanthocyanidin A2                                          | C30H24O12  | Flavonoids                   | C10237 |

|     |                                                 |            |                              |        |
|-----|-------------------------------------------------|------------|------------------------------|--------|
| 120 | (6Z,9Z,12Z)-Octadecatrienoic acid               | C18H30O2   | Fatty acids                  | C06426 |
| 121 | Mukaadial                                       | C15H22O4   | Terpenoids                   | C09702 |
| 122 | 2-trans,6-trans-Farnesal                        | C15H24O    | Terpenoids                   | C03461 |
| 123 | Octadecanamide                                  | C18H37NO   | Lipids                       | C13846 |
| 124 | Ricinoleic acid                                 | C18H34O3   | Fatty acids                  | C08365 |
| 125 | (9Z,12Z)-(8R)-Hydroxyoctadeca-9,12-dienoic acid | C18H32O3   | Fatty acids                  | C08318 |
| 126 | Capsidiol                                       | C15H24O2   | Terpenoids                   | C09627 |
| 127 | Brassicasterol                                  | C28H46O    | Terpenoids                   | C08813 |
| 128 | (11E)-Octadecenoic acid                         | C18H34O2   | Fatty acids                  | C08367 |
| 129 | Campestanol                                     | C28H50O    | Terpenoids                   | C15787 |
| 130 | Geranylgeraniol                                 | C20H34O    | Terpenoids                   | C09094 |
| 131 | Stigmasterol                                    | C29H48O    | Terpenoids                   | C05442 |
| 132 | Malvalic acid                                   | C18H32O2   | Fatty acids                  | C08321 |
| 133 | Vernolic acid                                   | C18H32O3   | Fatty acids                  | C08368 |
| 134 | 2,7,11-Cembratrien-4,6-diol                     | C20H34O2   | Terpenoids                   | C09072 |
| 135 | Punicic acid                                    | C18H30O2   | Fatty acids                  | C08364 |
| 136 | Sterculic acid                                  | C19H34O2   | Fatty acids                  | C08366 |
| 137 | (9Z)-Hexadecenoic acid                          | C16H30O2   | Fatty acids                  | C08362 |
| 138 | Sterol 3-beta-D-glucoside                       | C23H38O6   | Terpenoids                   | C03641 |
| 139 | Phylloquinol                                    | C31H48O2   | Others                       | C03313 |
| 140 | Ergostane                                       | C28H50     | Terpenoids                   | C19664 |
| 141 | Linoleic acid                                   | C18H32O2   | Fatty acids                  | C01595 |
| 142 | p-Coumaroylagmatine                             | C14H20N4O2 | Amino acid related compounds | C04498 |
| 143 | Casbene                                         | C20H32     | Terpenoids                   | C01414 |
| 144 | 2-Phytyl-1,4-naphthoquinone                     | C30H44O2   | Terpenoids                   | C13309 |
| 145 | (9Z)-Octadecenoic acid                          | C18H34O2   | Fatty acids                  | C00712 |
| 146 | (24R,24(1)R)-Fucosterol epoxide                 | C29H48O2   | Terpenoids                   | C03910 |
| 147 | alpha-Tocopherol                                | C29H50O2   | Others                       | C02477 |
| 148 | Betulin                                         | C30H50O2   | Terpenoids                   | C08618 |
| 149 | Cathasterone                                    | C28H48O3   | Terpenoids                   | C15790 |
| 150 | 6-Oxocampestanol                                | C28H48O2   | Terpenoids                   | C15789 |
| 151 | alpha-Oxo-benzeneacetic acid                    | C8H6O3     | Organic acids                | C02137 |
| 152 | Gallate                                         | C7H6O5     | Organic acids                | C01424 |

**Table S2.** Differential metabolites between Chinese and Canadian rapeseeds ( $|p(\text{corr})|>0.8$ ,  $p\text{-value}<0.001$ , and  $\text{FC}>2$  or  $<0.5$ ).

| No. | FC        | p value  | $ p(\text{corr}) $ | Chemical Compound                      | Formula   | Class                        |
|-----|-----------|----------|--------------------|----------------------------------------|-----------|------------------------------|
| 1   | 437.04    | 4.04E-46 | 0.99621            | Lathodoratin                           | C11H10O4  | Polyketides                  |
| 2   | 2732.8    | 1.62E-37 | 0.99251            | Sinapine                               | C16H24NO5 | Phenylpropanoids             |
| 3   | 0.023474  | 9.72E-36 | 0.99187            | Brassicasterol                         | C28H46O   | Terpenoids                   |
| 4   | 0.11855   | 6.82E-33 | 0.98934            | 6-Oxocampestanol                       | C28H48O2  | Terpenoids                   |
| 5   | 22.726    | 7.92E-34 | 0.98848            | Scoparone                              | C11H10O4  | Phenylpropanoids             |
| 6   | 206.32    | 2.47E-32 | 0.98588            | Abscisate                              | C15H20O4  | Terpenoids                   |
| 7   | 34.68     | 6.20E-31 | 0.9851             | Lucenin-2                              | C27H30O16 | Flavonoids                   |
| 8   | 0.042901  | 3.15E-29 | 0.98292            | 2-Methoxy-5Z-hexadecenoic acid         | C17H32O3  | Fatty acids                  |
| 9   | 38.225    | 6.05E-29 | 0.98276            | Luteolin                               | C15H10O6  | Flavonoids                   |
| 10  | 0.038253  | 3.58E-29 | 0.9823             | Ergostane                              | C28H50    | Terpenoids                   |
| 11  | 24.262    | 1.51E-29 | 0.98206            | Kaempferol                             | C15H10O6  | Flavonoids                   |
| 12  | 43.065    | 1.99E-28 | 0.97958            | Allotetrahydrodeoxycorticosterone      | C21H34O3  | Others                       |
| 13  | 0.07857   | 2.63E-28 | 0.97896            | Campestanol                            | C28H50O   | Terpenoids                   |
| 14  | 3.6625    | 1.24E-27 | 0.97713            | Coniferin                              | C16H22O8  | Phenylpropanoids             |
| 15  | 13.882    | 1.38E-26 | 0.97535            | Vernolic acid                          | C18H32O3  | Fatty acids                  |
| 16  | 0.0044011 | 1.21E-26 | 0.97503            | Octadecanamide                         | C18H37NO  | Lipids                       |
| 17  | 4.829     | 1.04E-25 | 0.97438            | Sterol 3-beta-D-glucoside              | C23H38O6  | Terpenoids                   |
| 18  | 65.33     | 1.79E-26 | 0.97434            | L-2-Amino adipate                      | C6H11NO4  | Amino acids                  |
| 19  | 42.202    | 7.01E-25 | 0.9711             | (9Z)-Octadecenoic acid                 | C18H34O2  | Fatty acids                  |
| 20  | 0.12919   | 6.27E-24 | 0.96828            | Capsidiol                              | C15H24O2  | Terpenoids                   |
| 21  | 18.757    | 1.43E-23 | 0.96495            | Linoleic acid                          | C18H32O2  | Fatty acids                  |
| 22  | 0.048788  | 3.17E-22 | 0.96104            | Stigmasterol                           | C29H48O   | Terpenoids                   |
| 23  | 13.267    | 2.09E-22 | 0.96067            | Proanthocyanidin A2                    | C30H24O12 | Flavonoids                   |
| 24  | 17.715    | 3.04E-22 | 0.96061            | Catechin 7-O-beta-D-xyloside           | C20H22O10 | Flavonoids                   |
| 25  | 21.412    | 1.03E-22 | 0.9596             | Abscisic acid glucose ester            | C21H30O9  | Others                       |
| 26  | 32.388    | 9.19E-23 | 0.95929            | Kaempferol 3-sophorotrioside           | C33H40O21 | Flavonoids                   |
| 27  | 0.076706  | 1.00E-21 | 0.95659            | Gallate                                | C7H6O5    | Organic acids                |
| 28  | 0.084899  | 1.24E-21 | 0.95491            | 3-(4-Hydroxyphenyl)lactate             | C9H10O4   | Others                       |
| 29  | 77.905    | 1.97E-21 | 0.95469            | Khellol glucoside                      | C19H20O10 | Polyketides                  |
| 30  | 34.685    | 4.21E-21 | 0.95284            | Quercitrin                             | C21H20O11 | Flavonoids                   |
| 31  | 25.544    | 8.28E-22 | 0.9522             | L-Tyrosine                             | C9H11NO3  | Amino acids                  |
| 32  | 8.7044    | 3.10E-20 | 0.94661            | Samaderin A                            | C18H18O6  | Terpenoids                   |
| 33  | 0.043726  | 1.80E-20 | 0.94647            | 5alpha-Ergosta-7,22-diene-3beta,5-diol | C28H46O2  | Terpenoids                   |
| 34  | 4.6732    | 7.84E-20 | 0.94375            | Cyanidin                               | C15H11O6  | Flavonoids                   |
| 35  | 33.801    | 6.62E-20 | 0.94316            | Dalpanin                               | C26H30O12 | Flavonoids                   |
| 36  | 0.086672  | 1.73E-19 | 0.94236            | Xanthurenic acid                       | C10H7NO4  | Amino acid related compounds |
| 37  | 6.0087    | 1.72E-18 | 0.9321             | Phytosphingosine                       | C18H39NO3 | Lipids                       |

|    |          |          |         |                                             |            |                              |
|----|----------|----------|---------|---------------------------------------------|------------|------------------------------|
| 38 | 11.047   | 3.54E-18 | 0.93024 | Cyanidin 3,5,3'-tri-O-glucoside             | C33H41O21  | Flavonoids                   |
| 39 | 19.677   | 1.40E-17 | 0.92853 | Punicic acid                                | C18H30O2   | Fatty acids                  |
| 40 | 6.2822   | 7.48E-18 | 0.92627 | (9Z)-Hexadecenoic acid                      | C16H30O2   | Fatty acids                  |
| 41 | 3.7185   | 6.00E-18 | 0.92605 | p-Coumaroylagmatine                         | C14H20N4O2 | Amino acid related compounds |
| 42 | 9.7523   | 2.64E-17 | 0.91969 | cis-3,4-Leucopelargonidin                   | C15H14O6   | Flavonoids                   |
| 43 | 0.053333 | 2.59E-16 | 0.91312 | 5-(2-Hydroxyethyl)-4-methylthiazole         | C6H9NOS    | Alkaloids                    |
| 44 | 3.7067   | 4.28E-16 | 0.91152 | Coumarin                                    | C9H6O2     | Phenylpropanoids             |
| 45 | 0.1048   | 3.86E-16 | 0.9063  | Goyazensolide                               | C19H20O7   | Terpenoids                   |
| 46 | 4.1359   | 2.33E-15 | 0.90201 | 2-Phytyl-1,4-naphthoquinone                 | C30H44O2   | Terpenoids                   |
| 47 | 0.1119   | 1.86E-14 | 0.89284 | Homogentisate                               | C8H8O4     | Organic acids                |
| 48 | 0.20936  | 3.40E-14 | 0.88853 | Ferulate                                    | C10H10O4   | Phenylpropanoids             |
| 49 | 4.5995   | 5.08E-14 | 0.8872  | Sinapate                                    | C11H12O5   | Phenylpropanoids             |
| 50 | 0.49741  | 7.09E-14 | 0.8839  | trans-2-Hydroxycinnamate                    | C9H8O3     | Phenylpropanoids             |
| 51 | 4.694    | 4.30E-14 | 0.88334 | Vicianin                                    | C19H25NO10 | Amino acid related compounds |
| 52 | 0.29132  | 4.52E-14 | 0.88283 | Herniarin                                   | C10H8O3    | Phenylpropanoids             |
| 53 | 13.606   | 2.94E-14 | 0.87842 | Stearidonic acid                            | C18H28O2   | Fatty acids                  |
| 54 | 0.4003   | 1.70E-13 | 0.87738 | Umbelliferone                               | C9H6O3     | Phenylpropanoids             |
| 55 | 4.1622   | 2.41E-13 | 0.87602 | 1-O-Sinapoyl-beta-D-glucose                 | C17H22O10  | Phenylpropanoids             |
| 56 | 0.37351  | 1.46E-13 | 0.87589 | Coniferyl alcohol                           | C10H12O3   | Phenylpropanoids             |
| 57 | 0.08541  | 1.42E-12 | 0.86574 | Betulin                                     | C30H50O2   | Terpenoids                   |
| 58 | 0.15651  | 1.29E-12 | 0.85973 | 1-Acetoxy-pinorensinol                      | C22H24O8   | Phenylpropanoids             |
| 59 | 0.13966  | 4.24E-12 | 0.85116 | 7-Methylxanthosine                          | C11H15N4O6 | Alkaloids                    |
| 60 | 11.499   | 2.16E-12 | 0.84759 | (6Z,9Z,12Z)-Octadecatrienoic acid           | C18H30O2   | Fatty acids                  |
| 61 | 6.8409   | 9.24E-12 | 0.84744 | 5-(2'-Carboxyethyl)-4,6-dihydroxypicolinate | C9H9NO6    | Amino acid related compounds |
| 62 | 11.676   | 8.69E-12 | 0.84386 | Dehydrocycloguanandin                       | C18H14O4   | Polyketides                  |
| 63 | 0.14803  | 3.07E-11 | 0.83715 | Helminthosporol                             | C15H24O2   | Terpenoids                   |
| 64 | 0.10659  | 5.70E-11 | 0.8315  | Pimelic acid                                | C7H12O4    | Fatty acids                  |
| 65 | 4.8487   | 1.87E-10 | 0.81461 | 2-Oxo-7-methylthioheptanoic acid            | C8H14O3S   | Fatty acids                  |
| 66 | 0.13294  | 5.32E-10 | 0.80682 | (15Z)-12-Oxophyto-10,15-dienoic acid        | C18H28O3   | Fatty acids                  |
| 67 | 0.10135  | 3.95E-10 | 0.80368 | (24R,24(1)R)-Fucosterol epoxide             | C29H48O2   | Terpenoids                   |

**Table S3.** Differential metabolites between Chinese and Mongolian rapeseeds ( $|p(\text{corr})| > 0.8$ ,  $p\text{-value} < 0.001$ , and  $\text{FC} > 2$  or  $< 0.5$ ).

| No. | FC       | p value  | $ p(\text{corr}) $ | Chemical Compound                               | Formula       | Class                        |
|-----|----------|----------|--------------------|-------------------------------------------------|---------------|------------------------------|
| 1   | 0.10235  | 4.89E-41 | 0.98288            | Octadecanamide                                  | C18H37NO      | Lipids                       |
| 2   | 72.475   | 4.45E-40 | 0.98126            | (9Z)-Octadecenoic acid                          | C18H34O2      | Fatty acids                  |
| 3   | 7.9253   | 2.23E-36 | 0.98034            | alpha-Oxo-benzeneacetic acid                    | C8H6O3        | Organic acids                |
| 4   | 24.778   | 4.22E-38 | 0.97814            | Allotetrahydrodeoxycorticosterone               | C21H34O3      | Others                       |
| 5   | 6.9315   | 5.07E-35 | 0.97672            | 2-Phytyl-1,4-naphthoquinone                     | C30H44O2      | Terpenoids                   |
| 6   | 0.20634  | 1.95E-34 | 0.97612            | Umbelliferone                                   | C9H6O3        | Phenylpropanoids             |
| 7   | 81.921   | 3.58E-37 | 0.97581            | Linoleic acid                                   | C18H32O2      | Fatty acids                  |
| 8   | 0.085075 | 2.43E-37 | 0.97494            | alpha-Tocopherol                                | C29H50O2      | Others                       |
| 9   | 6.5668   | 9.52E-32 | 0.96813            | 2-Methoxy-5Z-hexadecenoic acid                  | C17H32O3      | Fatty acids                  |
| 10  | 7.5693   | 3.19E-30 | 0.96562            | 5-(2-Hydroxyethyl)-4-methylthiazole             | C6H9NOS       | Alkaloids                    |
| 11  | 0.26203  | 1.77E-29 | 0.96227            | Scopoletin                                      | C10H8O4       | Phenylpropanoids             |
| 12  | 4.9317   | 3.90E-28 | 0.96048            | Malvidin-3-(p-coumaroyl)-rutinoside-5-glucoside | C44H51O23     | Flavonoids                   |
| 13  | 4.3068   | 5.43E-28 | 0.95908            | Phylloquinol                                    | C31H48O2      | Others                       |
| 14  | 11.128   | 1.15E-28 | 0.95369            | (9Z)-Hexadecenoic acid                          | C16H30O2      | Fatty acids                  |
| 15  | 0.1274   | 1.16E-26 | 0.95146            | Coniferyl aldehyde                              | C10H10O3      | Phenylpropanoids             |
| 16  | 7.8436   | 5.58E-27 | 0.95037            | p-Coumaroylagmatine                             | C14H20N4O2    | Amino acid related compounds |
| 17  | 0.31712  | 9.20E-26 | 0.94679            | Herniarin                                       | C10H8O3       | Phenylpropanoids             |
| 18  | 4.7102   | 3.95E-25 | 0.94186            | N-Acetylaspartylglutamate                       | C11H16N2O8    | Amino acid related compounds |
| 19  | 0.35819  | 1.87E-25 | 0.93469            | Gallate                                         | C7H6O5        | Organic acids                |
| 20  | 7.5966   | 1.63E-22 | 0.93442            | 5-(2'-Carboxyethyl)-4,6-dihydroxypicolinate     | C9H9NO6       | Amino acid related compounds |
| 21  | 14.111   | 6.12E-23 | 0.92447            | Leucocyanidin                                   | C15H14O7      | Flavonoids                   |
| 22  | 2.6142   | 2.70E-22 | 0.92257            | Sterol 3-beta-D-glucoside                       | C23H38O6      | Terpenoids                   |
| 23  | 0.19755  | 2.44E-22 | 0.92174            | Brassicasterol                                  | C28H46O       | Terpenoids                   |
| 24  | 11.134   | 3.02E-22 | 0.916              | Glutathione disulfide                           | C20H32N6O12S2 | Amino acid related compounds |
| 25  | 8.638    | 9.66E-22 | 0.91377            | Chlorogenate                                    | C16H18O9      | Phenylpropanoids             |
| 26  | 0.018926 | 4.06E-21 | 0.911              | 6-Oxocampestanol                                | C28H48O2      | Terpenoids                   |
| 27  | 2.5696   | 1.10E-19 | 0.91096            | N-Formylmethionine                              | C6H11NO3S     | Amino acids                  |
| 28  | 2.4978   | 1.36E-19 | 0.90883            | Ricinoleic acid                                 | C18H34O3      | Fatty acids                  |
| 29  | 0.22664  | 1.81E-20 | 0.90352            | Cucurbitacin D                                  | C30H44O7      | Terpenoids                   |
| 30  | 0.28636  | 1.07E-20 | 0.90252            | Phytosphingosine                                | C18H39NO3     | Lipids                       |
| 31  | 3.8826   | 2.30E-18 | 0.89758            | Quercitrin                                      | C21H20O11     | Flavonoids                   |
| 32  | 3.0421   | 1.56E-18 | 0.89174            | Aurantio-obtusin beta-D-glucoside               | C23H24O12     | Polyketides                  |
| 33  | 3.8297   | 9.92E-19 | 0.89137            | L-2-Aminoadipate                                | C6H11NO4      | Amino acids                  |
| 34  | 2.9276   | 5.36E-17 | 0.88393            | Malonylawobanin                                 | C39H39O22     | Flavonoids                   |
| 35  | 0.40502  | 1.08E-17 | 0.87671            | Homogentisate                                   | C8H8O4        | Organic acids                |
| 36  | 2.7657   | 8.44E-16 | 0.8593             | Cyanin                                          | C27H31O16     | Flavonoids                   |
| 37  | 0.029809 | 7.17E-16 | 0.8583             | 5alpha-Ergosta-7,22-diene-3beta,5-diol          | C28H46O2      | Terpenoids                   |



|    |          |          |         |                                                              |            |                              |
|----|----------|----------|---------|--------------------------------------------------------------|------------|------------------------------|
| 38 | 0.29164  | 3.26E-15 | 0.85223 | 1-Acetoxy-pinoreosinol                                       | C22H24O8   | Phenylpropanoids             |
| 39 | 11.928   | 8.93E-16 | 0.852   | N-(L-Arginino)succinate                                      | C10H18N4O6 | Amino acids                  |
| 40 | 2.6464   | 1.12E-14 | 0.84727 | Iridin                                                       | C24H26O13  | Flavonoids                   |
| 41 | 3.8109   | 1.87E-14 | 0.84092 | 7,8-Dihydroxycoumarin                                        | C9H6O4     | Phenylpropanoids             |
| 42 | 3.8244   | 8.24E-15 | 0.83541 | 2-Oxo-10-methylthiodecanoic acid                             | C11H20O3S  | Fatty acids                  |
| 43 | 3.3796   | 3.88E-14 | 0.8332  | Isorhamnetin                                                 | C16H12O7   | Flavonoids                   |
| 44 | 3.7093   | 1.67E-14 | 0.83045 | Naringenin 7-O-beta-D-glucoside                              | C21H22O10  | Flavonoids                   |
| 45 | 2.6622   | 6.83E-14 | 0.83045 | Lucenin-2                                                    | C27H30O16  | Flavonoids                   |
| 46 | 6.1863   | 2.05E-14 | 0.82635 | Delphinidin 5-O-beta-D-glucoside 3-O-beta-D-sambubioside     | C32H39O21  | Others                       |
| 47 | 2.9322   | 1.68E-13 | 0.81983 | Abscisic acid glucose ester                                  | C21H30O9   | Others                       |
| 48 | 5.3292   | 6.52E-13 | 0.81506 | 3-O-Methylquercetin                                          | C16H12O7   | Flavonoids                   |
| 49 | 2.7713   | 2.85E-13 | 0.81414 | Anthemis glycoside A                                         | C39H49NO21 | Amino acid related compounds |
| 50 | 0.067521 | 7.11E-13 | 0.81346 | Stigmasterol                                                 | C29H48O    | Terpenoids                   |
| 51 | 17.083   | 3.83E-13 | 0.8061  | Luteolin 7-O-[beta-D-glucuronosyl-(1->2)-beta-D-glucuronide] | C27H26O18  | Flavonoids                   |
| 52 | 2.3141   | 3.77E-12 | 0.80361 | Xanthurenic acid                                             | C10H7NO4   | Amino acid related compounds |
| 53 | 2.7586   | 8.65E-13 | 0.8023  | L-Tyrosine                                                   | C9H11NO3   | Amino acids                  |

**Table S4.** Differential metabolites between Canadian and Mongolian rapeseeds ( $|p(\text{corr})|>0.8$ ,  $p\text{-value}<0.001$ , and  $\text{FC}>2$  or  $<0.5$ ).

| No. | FC       | p value  | $ p(\text{corr}) $ | Chemical Compound                                | Formula    | Class                        |
|-----|----------|----------|--------------------|--------------------------------------------------|------------|------------------------------|
| 1   | 0.003686 | 1.36E-29 | 0.99673            | Lathodoratin                                     | C11H10O4   | Polyketides                  |
| 2   | 153.07   | 2.50E-27 | 0.99569            | 2-Methoxy-5Z-hexadecenoic acid                   | C17H32O3   | Fatty acids                  |
| 3   | 0.000716 | 1.86E-26 | 0.99424            | Sinapine                                         | C16H24NO5  | Phenylpropanoids             |
| 4   | 45.817   | 1.73E-21 | 0.98976            | Ergostane                                        | C28H50     | Terpenoids                   |
| 5   | 0.060205 | 1.34E-20 | 0.98815            | Kaempferol                                       | C15H10O6   | Flavonoids                   |
| 6   | 0.094489 | 2.75E-20 | 0.98499            | Vernolic acid                                    | C18H32O3   | Fatty acids                  |
| 7   | 26.7     | 3.77E-20 | 0.98465            | Xanthurenic acid                                 | C10H7NO4   | Amino acid related compounds |
| 8   | 0.047658 | 4.47E-19 | 0.98121            | Phytosphingosine                                 | C18H39NO3  | Lipids                       |
| 9   | 0.009135 | 1.01E-17 | 0.97774            | Abscisate                                        | C15H20O4   | Terpenoids                   |
| 10  | 0.058621 | 3.51E-17 | 0.97763            | L-2-Aminoadipate                                 | C6H11NO4   | Amino acids                  |
| 11  | 141.93   | 4.98E-17 | 0.97602            | 5-(2-Hydroxyethyl)-4-methylthiazole              | C6H9NOS    | Alkaloids                    |
| 12  | 0.043243 | 7.28E-18 | 0.97465            | Stearidonic acid                                 | C18H28O2   | Fatty acids                  |
| 13  | 0.29311  | 1.69E-16 | 0.9746             | Cyanidin                                         | C15H11O6   | Flavonoids                   |
| 14  | 0.052581 | 1.00E-17 | 0.9745             | (6Z,9Z,12Z)-Octadecatrienoic acid                | C18H30O2   | Fatty acids                  |
| 15  | 0.18656  | 1.13E-15 | 0.9732             | Luteolin 7-O-beta-D-glucoside                    | C21H20O11  | Flavonoids                   |
| 16  | 2.5022   | 7.21E-17 | 0.97304            | trans-2-Hydroxycinnamate                         | C9H8O3     | Phenylpropanoids             |
| 17  | 9.8622   | 2.39E-16 | 0.97297            | Capsidiol                                        | C15H24O2   | Terpenoids                   |
| 18  | 0.051945 | 2.11E-16 | 0.97203            | Dalpanin                                         | C26H30O12  | Flavonoids                   |
| 19  | 33.542   | 1.18E-15 | 0.96731            | Pimelic acid                                     | C7H12O4    | Fatty acids                  |
| 20  | 10.626   | 2.97E-16 | 0.96688            | 7,8-Dihydroxycoumarin                            | C9H6O4     | Phenylpropanoids             |
| 21  | 0.13604  | 5.17E-16 | 0.96664            | Coniferyl aldehyde                               | C10H10O3   | Phenylpropanoids             |
| 22  | 0.33802  | 1.70E-15 | 0.96632            | Coniferin                                        | C16H22O8   | Phenylpropanoids             |
| 23  | 3.6236   | 5.90E-16 | 0.96604            | Ferulate                                         | C10H10O4   | Phenylpropanoids             |
| 24  | 0.072263 | 2.61E-15 | 0.96477            | Scoparone                                        | C11H10O4   | Phenylpropanoids             |
| 25  | 0.095785 | 1.20E-15 | 0.96399            | 2-Methoxyestrone 3-sulfate                       | C19H24O6S  | Terpenoids                   |
| 26  | 0.16067  | 5.81E-15 | 0.96262            | Proanthocyanidin A2                              | C30H24O12  | Flavonoids                   |
| 27  | 5.9056   | 1.19E-14 | 0.9551             | L-Glutamate                                      | C5H9NO4    | Amino acids                  |
| 28  | 5.9162   | 2.50E-14 | 0.9543             | 3-(4-Hydroxyphenyl)lactate                       | C9H10O4    | Others                       |
| 29  | 0.024365 | 1.08E-13 | 0.95357            | Punicic acid                                     | C18H30O2   | Fatty acids                  |
| 30  | 0.17128  | 2.40E-14 | 0.95324            | Vicianin                                         | C19H25NO10 | Amino acid related compounds |
| 31  | 21.72    | 1.85E-13 | 0.94825            | Goyazensolide                                    | C19H20O7   | Terpenoids                   |
| 32  | 0.074695 | 1.04E-13 | 0.94507            | Dehydrocycloguanandin                            | C18H14O4   | Polyketides                  |
| 33  | 4.7112   | 5.46E-13 | 0.94379            | Sinensetin                                       | C20H20O7   | Flavonoids                   |
| 34  | 33.134   | 1.32E-12 | 0.94217            | Cyanidin 3-O-(6"-glucosyl-2"-xylosylgalactoside) | C32H39O20  | Flavonoids                   |
| 35  | 0.27533  | 2.52E-12 | 0.94112            | Tulipanin                                        | C27H31O16  | Flavonoids                   |
| 36  | 0.11802  | 2.14E-12 | 0.93485            | Catechin 7-O-beta-D-xyloside                     | C20H22O10  | Flavonoids                   |
| 37  | 0.10799  | 1.76E-12 | 0.93352            | L-Tyrosine                                       | C9H11NO3   | Amino acids                  |

|    |          |          |         |                                                              |            |                              |
|----|----------|----------|---------|--------------------------------------------------------------|------------|------------------------------|
| 38 | 41.764   | 3.89E-12 | 0.9306  | Luteolin 7-O-[beta-D-glucuronosyl-(1->2)-beta-D-glucuronide] | C27H26O18  | Flavonoids                   |
| 39 | 8.4155   | 1.65E-11 | 0.93057 | Brassicasterol                                               | C28H46O    | Terpenoids                   |
| 40 | 0.26219  | 7.57E-12 | 0.92721 | Hexadecaspheinganine                                         | C16H35NO2  | Lipids                       |
| 41 | 3.7259   | 8.04E-12 | 0.92442 | Coniferyl alcohol                                            | C10H12O3   | Phenylpropanoids             |
| 42 | 2.7754   | 5.17E-11 | 0.92057 | Malvidin-3-(p-coumaroyl)-rutinoside-5-glucoside              | C44H51O23  | Flavonoids                   |
| 43 | 0.19645  | 2.31E-11 | 0.91992 | Scopoletin                                                   | C10H8O4    | Phenylpropanoids             |
| 44 | 3.7826   | 3.70E-11 | 0.91911 | N-Acetylaspartylglutamate                                    | C11H16N2O8 | Amino acid related compounds |
| 45 | 0.13694  | 7.92E-11 | 0.9126  | Abscisic acid glucose ester                                  | C21H30O9   | Others                       |
| 46 | 4.5251   | 6.99E-11 | 0.91179 | (15Z)-12-Oxophyto-10,15-dienoic acid                         | C18H28O3   | Fatty acids                  |
| 47 | 10.187   | 8.54E-11 | 0.90923 | 3-O-Methylquercetin                                          | C16H12O7   | Flavonoids                   |
| 48 | 6.6293   | 2.41E-10 | 0.90835 | Sterculic acid                                               | C19H34O2   | Fatty acids                  |
| 49 | 0.076764 | 2.37E-10 | 0.90823 | Lucenin-2                                                    | C27H30O16  | Flavonoids                   |
| 50 | 23.256   | 1.87E-10 | 0.90559 | Octadecanamide                                               | C18H37NO   | Lipids                       |
| 51 | 4.6696   | 3.70E-10 | 0.90393 | Gallate                                                      | C7H6O5     | Organic acids                |
| 52 | 0.11194  | 1.72E-09 | 0.89191 | Quercitrin                                                   | C21H20O11  | Flavonoids                   |
| 53 | 5.2576   | 2.10E-09 | 0.88487 | Delphinidin 5-O-beta-D-glucoside 3-O-beta-D-sambubioside     | C32H39O21  | Others                       |
| 54 | 17.867   | 1.47E-09 | 0.88472 | Anthemis glycoside A                                         | C39H49NO21 | Amino acid related compounds |
| 55 | 0.018511 | 4.03E-09 | 0.88207 | Khellol glucoside                                            | C19H20O10  | Polyketides                  |
| 56 | 0.095105 | 2.78E-09 | 0.88201 | Kaempferol 3-sophorotrioside                                 | C33H40O21  | Flavonoids                   |
| 57 | 0.38154  | 4.38E-09 | 0.88169 | Rutin                                                        | C27H30O16  | Flavonoids                   |
| 58 | 3.1579   | 3.68E-09 | 0.87232 | 5-Hydroxyconiferyl alcohol                                   | C10H12O4   | Phenylpropanoids             |
| 59 | 18.62    | 9.93E-09 | 0.86896 | Chlorogenate                                                 | C16H18O9   | Phenylpropanoids             |
| 60 | 0.47353  | 1.98E-08 | 0.86484 | 1-O-Sinapoyl-beta-D-glucose                                  | C17H22O10  | Phenylpropanoids             |
| 61 | 10.496   | 2.61E-08 | 0.85931 | Casbene                                                      | C20H32     | Terpenoids                   |
| 62 | 10.545   | 2.54E-08 | 0.85609 | 7-Methylxanthosine                                           | C11H15N4O6 | Alkaloids                    |
| 63 | 4.3675   | 2.73E-07 | 0.83479 | Linoleic acid                                                | C18H32O2   | Fatty acids                  |
| 64 | 0.10808  | 1.38E-07 | 0.82678 | (9Z)-(13S)-12,13-Epoxyoctadeca-9,11-dienoic acid             | C18H30O3   | Fatty acids                  |
| 65 | 0.18784  | 6.80E-07 | 0.80773 | Tangeretin                                                   | C20H20O7   | Flavonoids                   |
| 66 | 2.4598   | 8.69E-07 | 0.80476 | 4-Hydroxyphenylacetate                                       | C8H8O3     | Phenylpropanoids             |
| 67 | 0.26396  | 1.10E-06 | 0.80259 | Ononin                                                       | C22H22O9   | Flavonoids                   |
| 68 | 0.36498  | 6.28E-07 | 0.80165 | 4',5,6,7-Tetramethoxyflavone                                 | C19H18O6   | Flavonoids                   |
